# Supplementary material for: Physicochemical and oxidative stability of a soybean oleosome-based emulsion and itsin vitrodigestive fate as affected by (−)-epigallocatechin-3-gallate
Source: Royal Society of Chemistry journal article supplement (doi:10.1039/c8fo01215f), 2018-01-01
Supplement: c8fo01215f1.pdf [file c8fo01215f1.pdf]

**Table S1.** Constitutions of buffer solutions at different pHs

|        |                                        |                                        |
|--------|----------------------------------------|----------------------------------------|
| pH 5.0 | 0.1 M Citric acid                      | 0.1 M Sodium citrate                   |
|        | 41.00 ml/L                             | 59.00 ml/L                             |
| pH 7.0 | 0.2 M Na <sub>2</sub> HPO <sub>4</sub> | 0.2 M NaH <sub>2</sub> PO <sub>4</sub> |
|        | 30.50 ml/L                             | 19.50 ml/L                             |
| pH 9.0 | 0.2 M Glycine                          | 0.2 M NaOH                             |
|        | 50.00 ml/L                             | 8.80 ml/L                              |
