# Supplementary material for: Physicochemical and oxidative stability of a soybean oleosome-based emulsion and itsin vitrodigestive fate as affected by (−)-epigallocatechin-3-gallate
Source: Royal Society of Chemistry journal article supplement (doi:10.1039/c8fo01215f), 2018-01-01
Supplement: c8fo01215f2.pdf [file c8fo01215f2.pdf]

**Table S2.** Average mean diameter ( $D_{4,3}$ , nm) of SOE and EGCG-SOE after *in vitro* gastric digestion and intestinal digestion.

| Sample      | Gastric digestion            |                               | Intestinal digestion          |                               |
|-------------|------------------------------|-------------------------------|-------------------------------|-------------------------------|
|             | 60 min                       | 30 min                        | 60 min                        | 120 min                       |
| SOE         | 776.96 ± 22.42 <sup>a</sup>  | 799.70 ± 26.83 <sup>d</sup>   | 1186.33 ± 116.26 <sup>b</sup> | 909.73 ± 45.96 <sup>a</sup>   |
| 10 µM EGCG  | 498.00 ± 11.27 <sup>e</sup>  | 683.63 ± 27.62 <sup>d</sup>   | 924.40 ± 34.22 <sup>bc</sup>  | 665.93 ± 22.11 <sup>b</sup>   |
| 20 µM EGCG  | 531.76 ± 29.65 <sup>d</sup>  | 706.30 ± 55.14 <sup>d</sup>   | 952.00 ± 84.57 <sup>bc</sup>  | 709.33 ± 113.76 <sup>b</sup>  |
| 50 µM EGCG  | 618.06 ± 19.60 <sup>c</sup>  | 2173.33 ± 379.27 <sup>c</sup> | 3024.00 ± 173.35 <sup>a</sup> | 843.50 ± 93.58 <sup>b</sup>   |
| 100 µM EGCG | 642.33 ± 35.04 <sup>bc</sup> | 3178.67 ± 144.79 <sup>b</sup> | 1388.40 ± 117.85 <sup>b</sup> | 852.60 ± 10.19 <sup>b</sup>   |
| 150 µM EGCG | 653.96 ± 25.25 <sup>b</sup>  | 4032.33 ± 166.53 <sup>a</sup> | 3778.66 ± 144.76 <sup>a</sup> | 1047.83 ± 211.99 <sup>a</sup> |

\* the same superscript letters in the same column are not significantly different ( $p > 0.05$ ).
